# Supplementary material for: Single-Cell Analysis Reveals that Chronic Silver Nanoparticle Exposure Induces Cell Division Defects in Human Epithelial Cells
Source: Int J Environ Res Public Health. 2019 Jun 11;16(11):2061. doi: 10.3390/ijerph16112061 (PMC6603987; doi:10.3390/ijerph16112061)
Supplement: Supplementary file 1 [file ijerph-16-02061-s001.zip]

Archive with 4 entries (4 files):
- Garcia et al_2018_IJEPH_SupplMat_R1.pdf
- Garcia-et-al_VideoS1.mov
- Garcia-et-al_VideoS2.mov
- Garcia-et-al_VideoS3.mov
